# Supplementary material
Source: PubMed Central journal article supplement (PMC2846221)
Supplement: NIHMS161714-supplement-1_si_001.pdf [file NIHMS161714-supplement-1_si_001.pdf]

# Hymenopsins A and B and a Macrophorin Analogue from a Fungicolous *Hymenopsis* sp.

Lori E. Schmidt,<sup>†</sup> Stephen T. Deyrup,<sup>†</sup> Jonas Baltrusaitis,<sup>†</sup> Dale C.

Swenson,<sup>†</sup> Donald T. Wicklow,<sup>‡</sup> and James B. Gloer<sup>\*†</sup>

<sup>†</sup>*Department of Chemistry, University of Iowa, Iowa City, IA, 52242*

<sup>‡</sup>*Mycotoxin Research Unit, Agricultural Research Service, USDA National Center for  
Agricultural Utilization Research, USDA, Peoria, IL, 61604*

## List of Supporting Information

**Figure S1.** <sup>1</sup>H NMR spectrum of hymenopsin A (**1**; 600 MHz, acetone-*d*<sub>6</sub>)

**Figure S2.** <sup>13</sup>C NMR spectrum of hymenopsin A (**1**; 75 MHz, methanol-*d*<sub>4</sub>)

**Figure S3.** <sup>1</sup>H NMR spectrum of hymenopsin B (**2**; 400 MHz, CDCl<sub>3</sub>)

**Figure S4.** <sup>13</sup>C NMR spectrum of hymenopsin B (**2**; 75 MHz, CDCl<sub>3</sub>)

**Figure S5.** <sup>1</sup>H NMR spectrum of 2',3'-epoxy-13-hydroxy-4'-oxomacrophorin A (**3**; 300 MHz, CDCl<sub>3</sub>)

**Figure S6.** <sup>13</sup>C NMR spectrum of 2',3'-epoxy-13-hydroxy-4'-oxomacrophorin A (**3**; 75 MHz, CDCl<sub>3</sub>)

**Figure S7.** Lowest energy conformation of hymenopsin B (**2**) based on ORCA/RI-SCS-MP2/TZVP calculations viewed along the O=C bond on axes as employed in application of the octant rule.

**Figure S8.** Calculated, weighted-average CD spectrum of 10 lowest energy conformers of **2** showing negative Cotton effect in 320-330 range.

**Figure S9.** CD spectrum of **2** showing negative Cotton effect in 320-330 range.

\*To whom correspondence should be addressed. Tel: 319-335-1361. Fax 319-335-1270.

E-mail: james-gloer@uiowa.edu.

<sup>†</sup>University of Iowa

<sup>‡</sup>USDA National Center for Agricultural Utilization Research

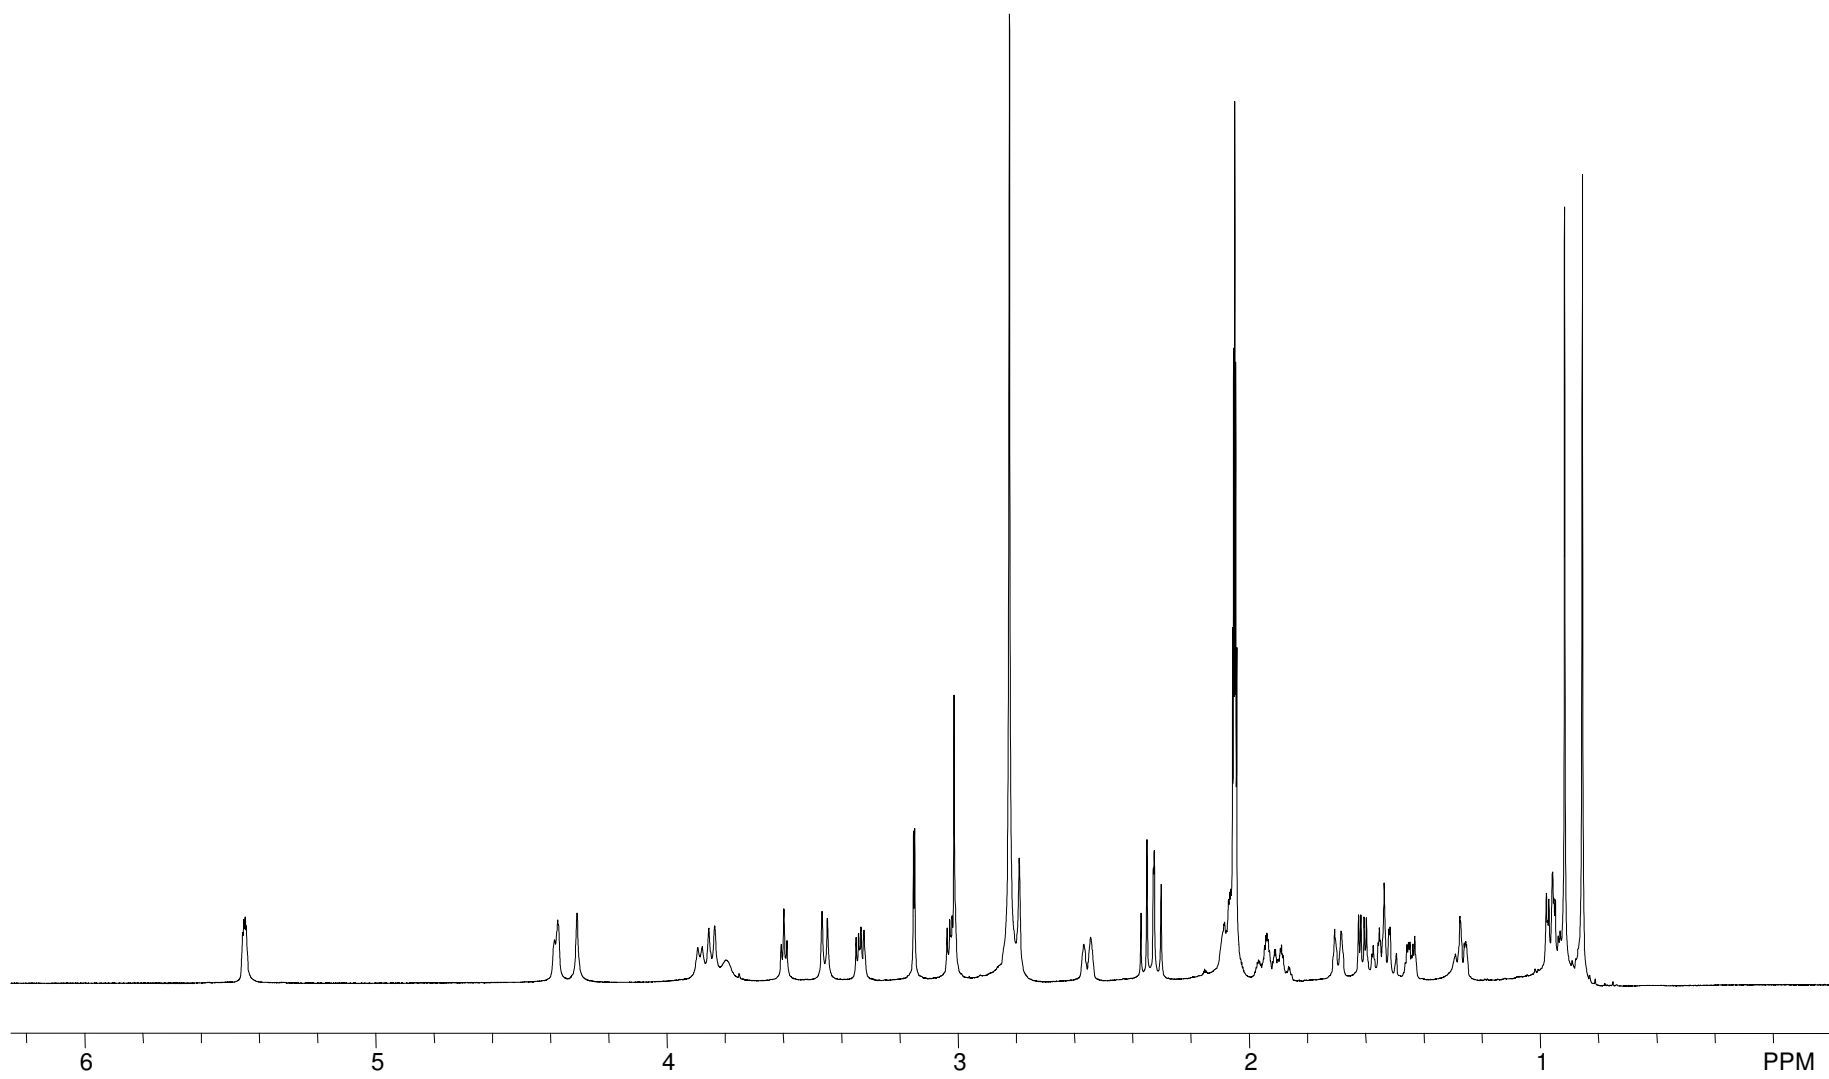

**Figure S1.**  $^1\text{H}$  NMR spectrum of hymenopsin A (**1**; 600 MHz, acetone- $d_6$ )

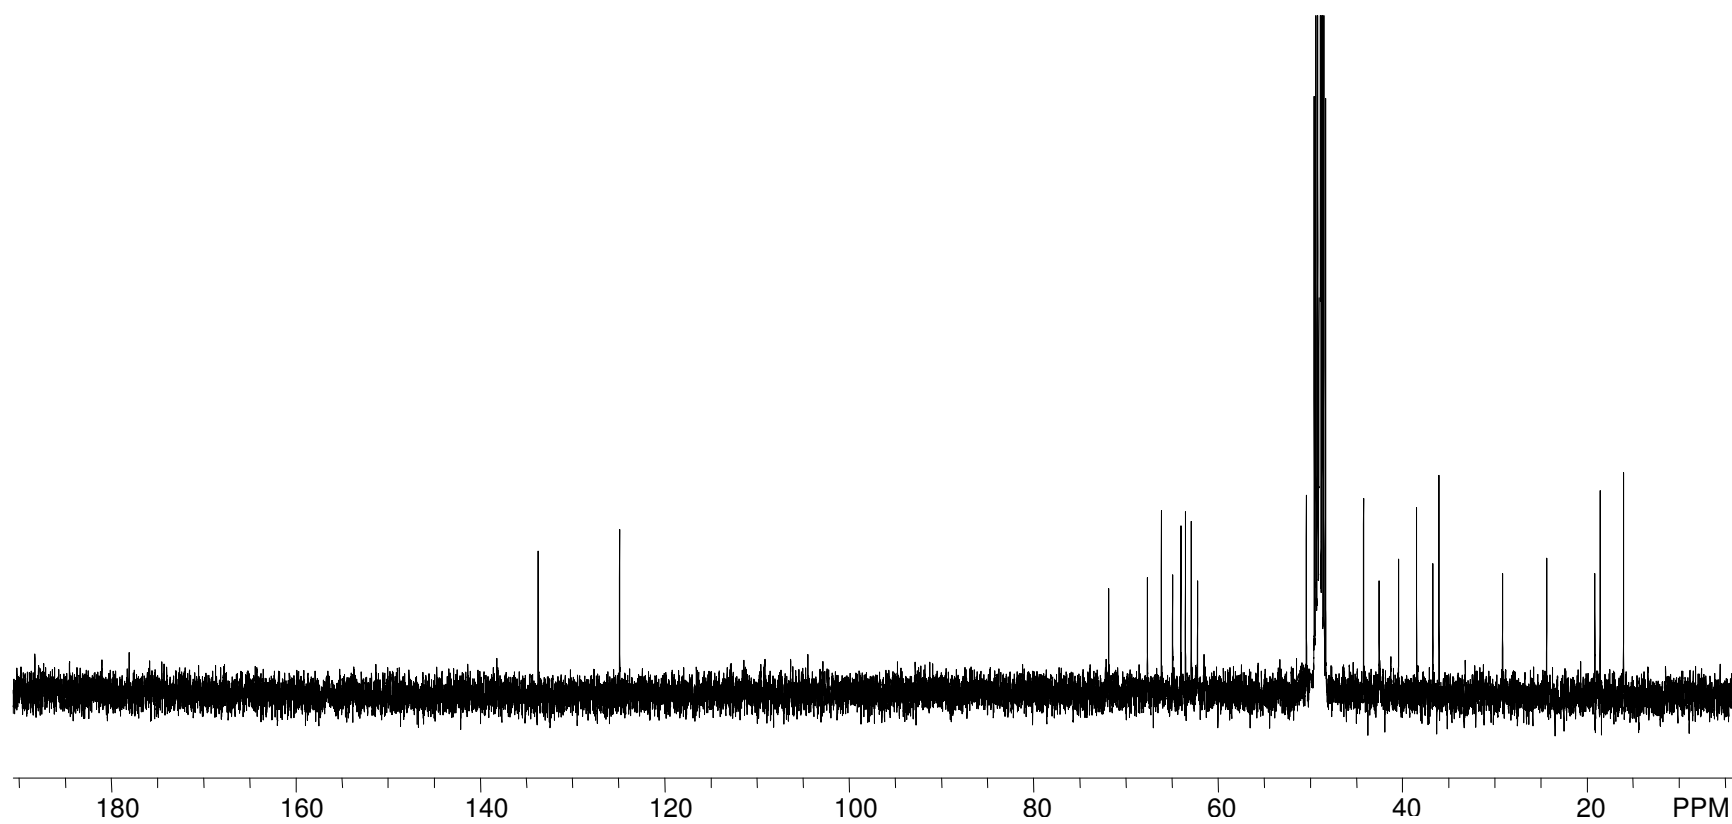

**Figure S2.**  $^{13}\text{C}$  NMR spectrum of hymenopsin A (1; 75 MHz,  $\text{methanol-}d_4$ )

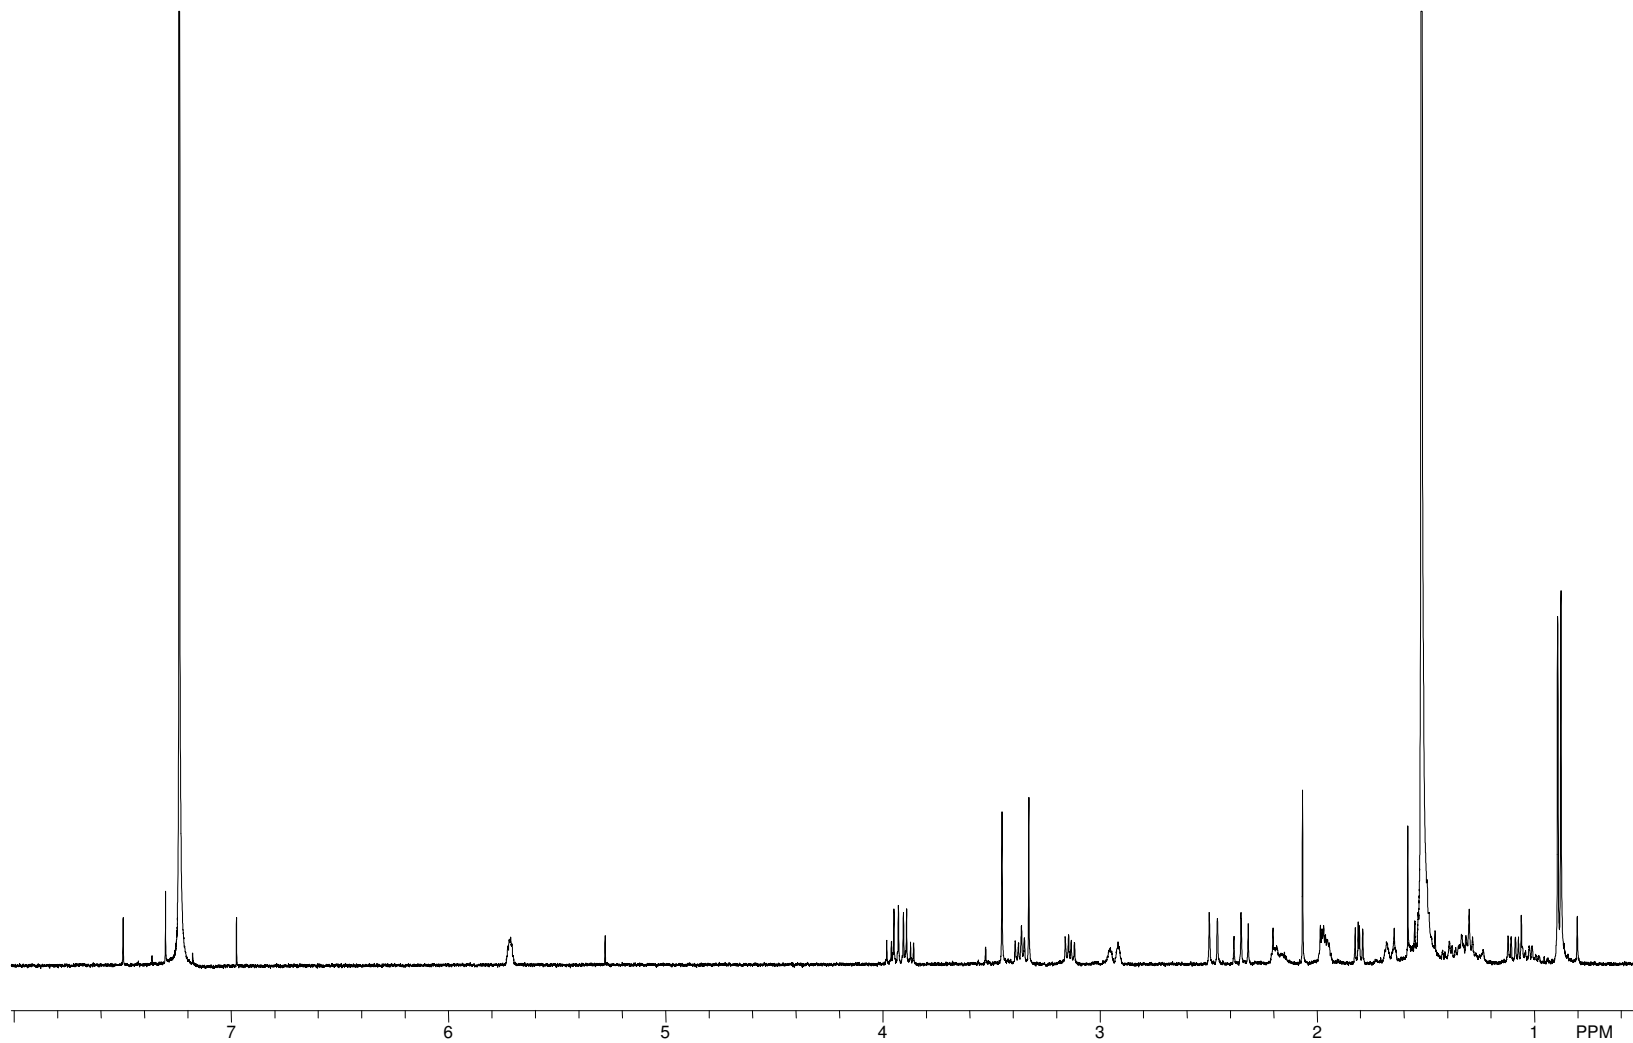

**Figure S3.**  $^1\text{H}$  NMR spectrum of hymenopsin B (**2**; 400 MHz,  $\text{CDCl}_3$ )

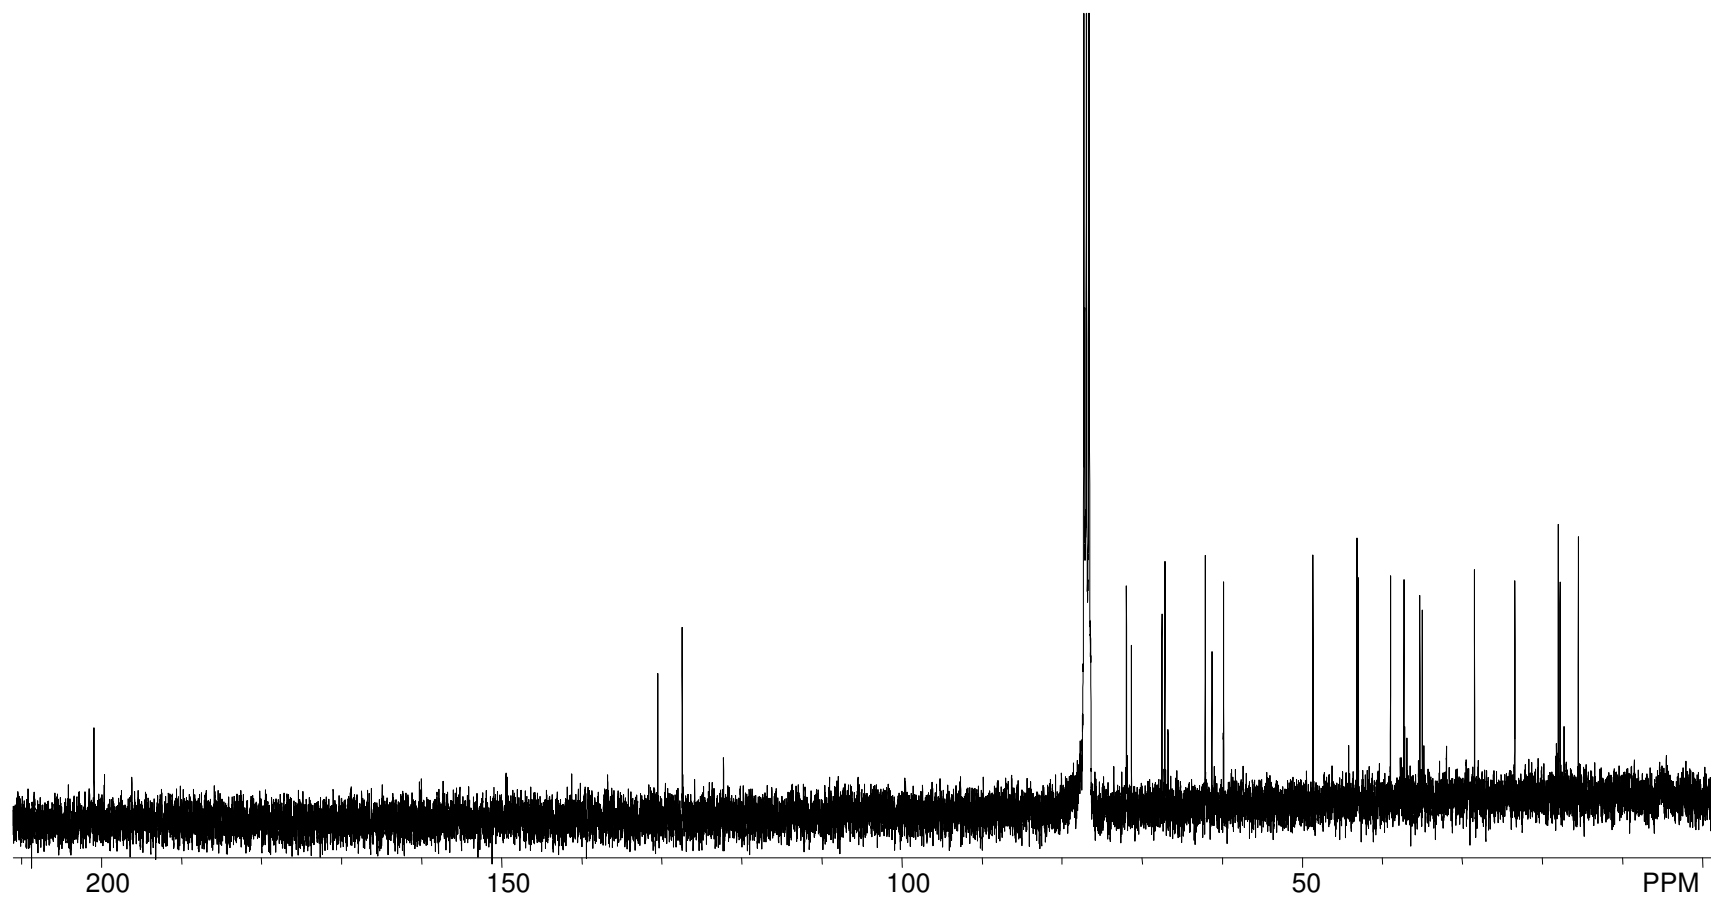

**Figure S4.**  $^{13}\text{C}$  NMR spectrum of hymenopsin B (2; 75 MHz,  $\text{CDCl}_3$ )

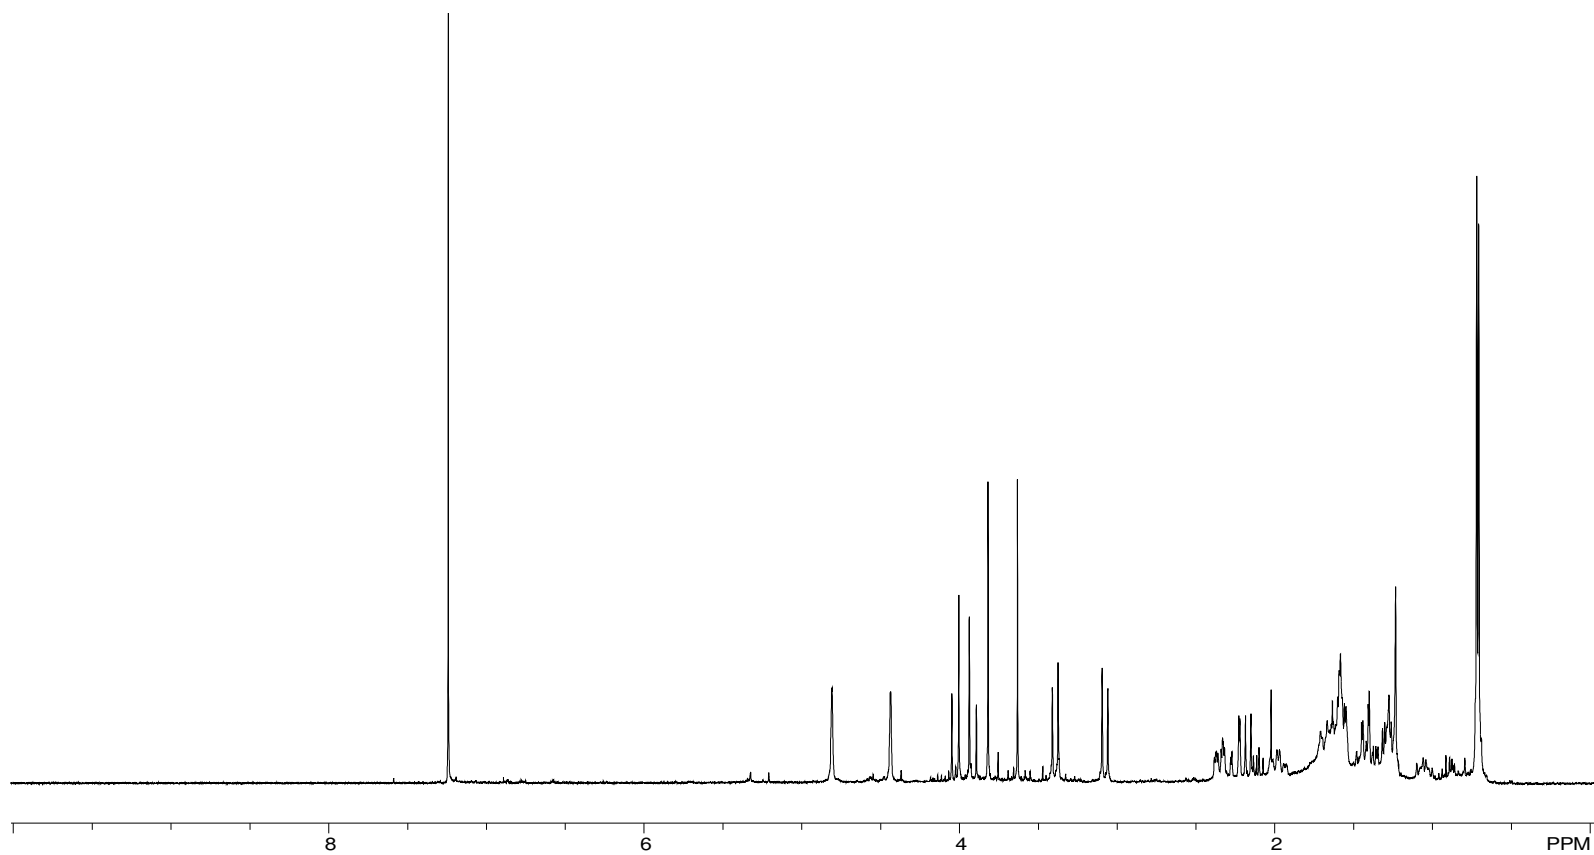

**Figure S5.** <sup>1</sup>H NMR spectrum of 2',3'-epoxy-13-hydroxy-4'-oxomacrophorin A (**3**; 300 MHz, CDCl<sub>3</sub>)

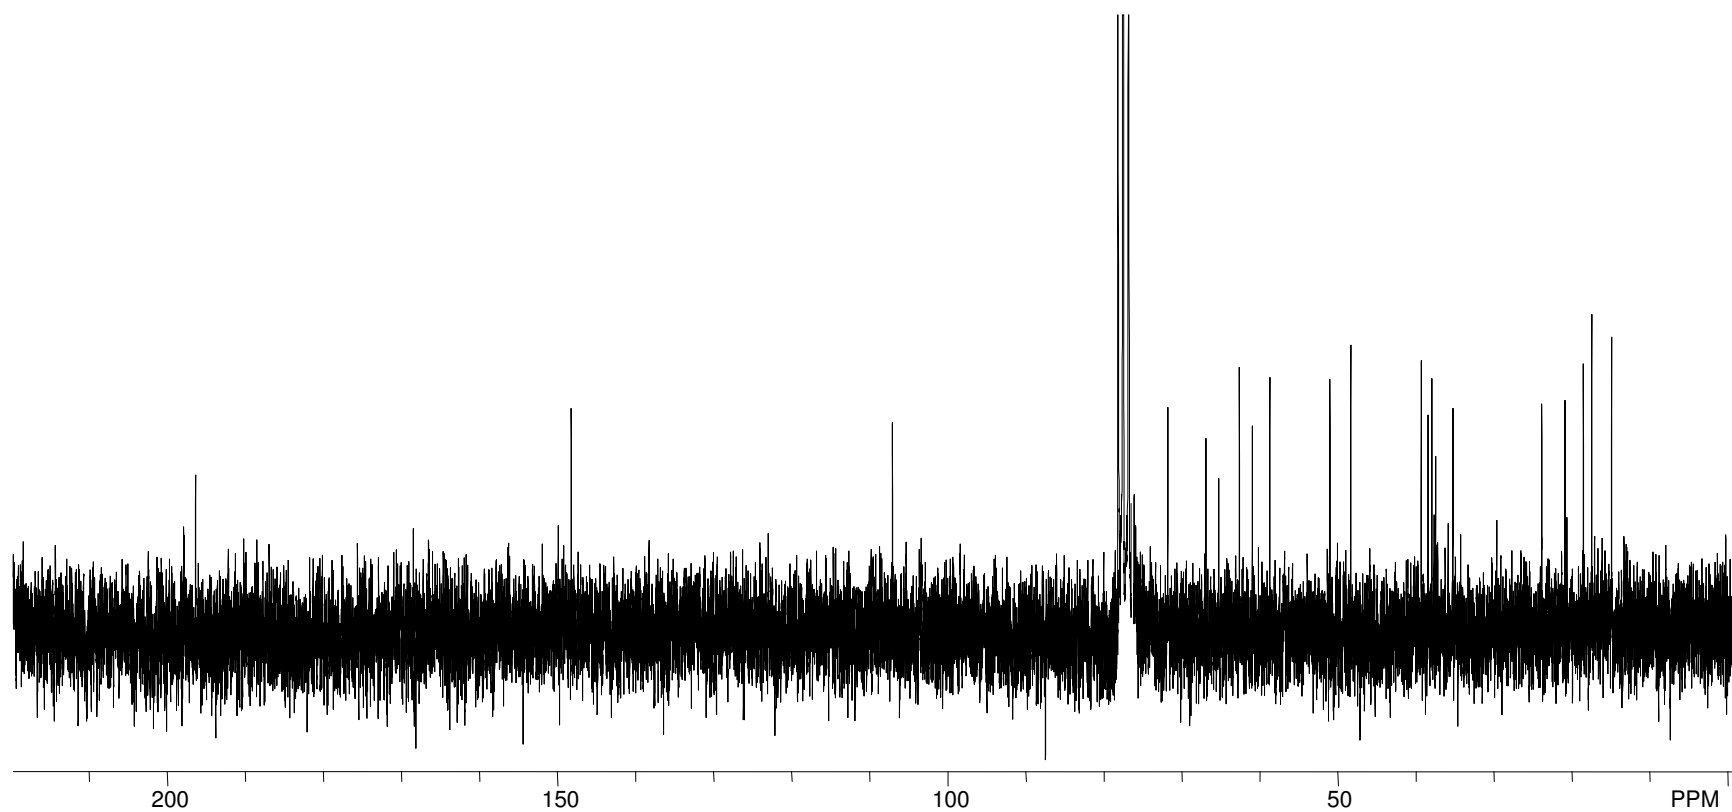

**Figure S6.**  $^{13}\text{C}$  NMR spectrum of 2',3'-epoxy-13-hydroxy-4'-oxomacrophorin A (**3**; 75 MHz,  $\text{CDCl}_3$ )

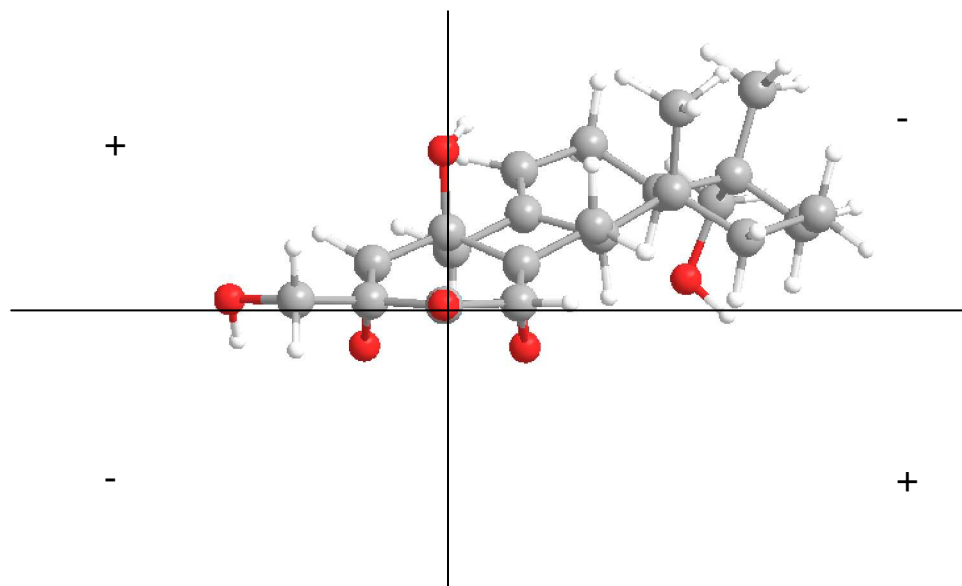

**Figure S7.** Lowest energy conformation of hymenopsin B (**2**) based on ORCA/RI-SCS-MP2/TZVP calculations viewed along the O=C bond on axes as employed in application of the octant rule.



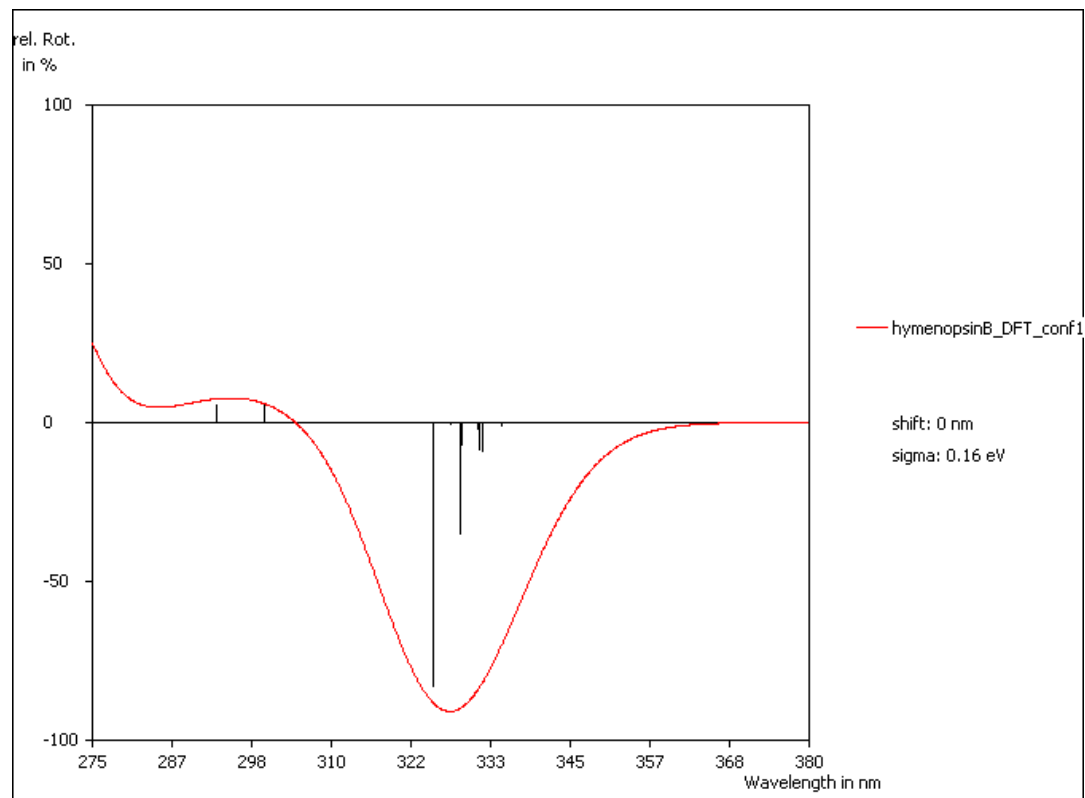

**Figure S8.** Calculated, weighted-average CD spectrum of 10 lowest energy conformers of **2** showing negative Cotton effect in 320-330 range.

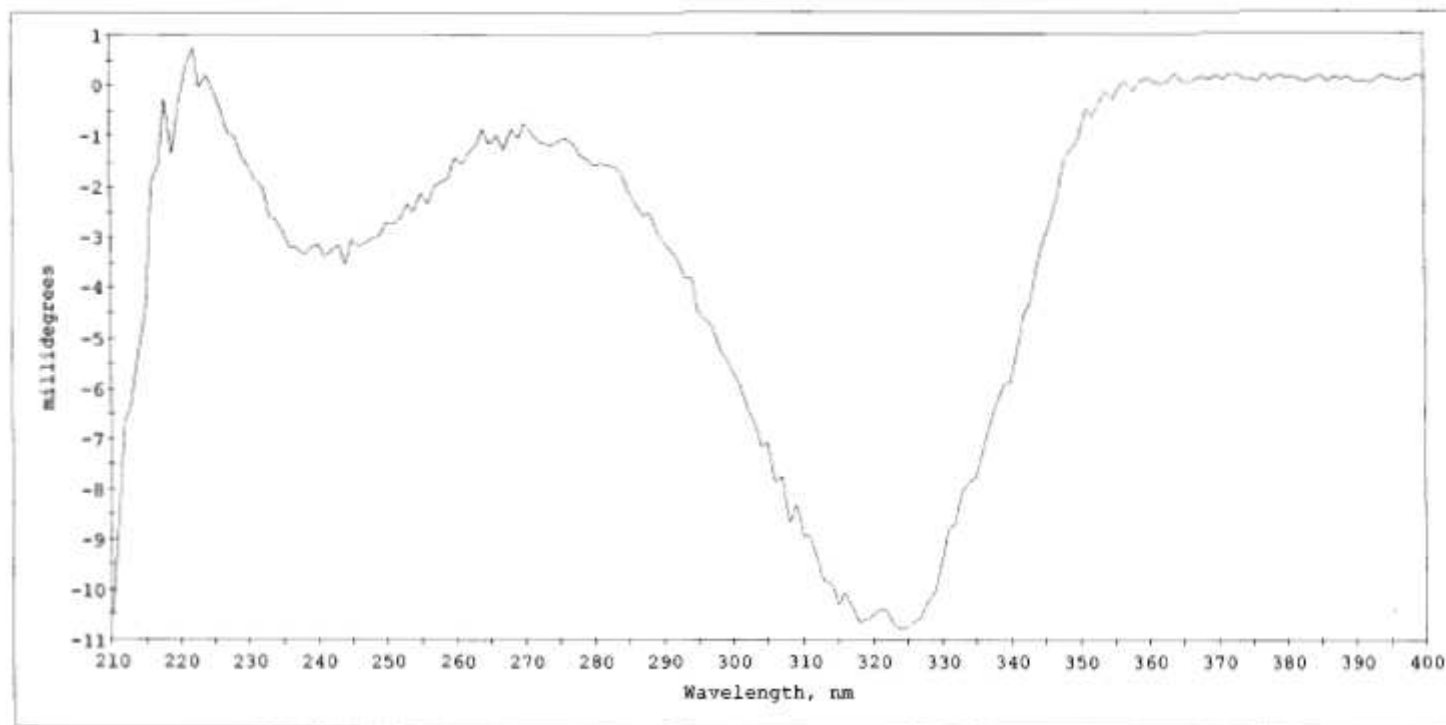

**Figure S9.** CD spectrum of **2** showing negative Cotton effect in 320-330 range.
